# Supplementary material
Source: publisher site journal article supplement (https://www.dovepress.com/article/537560)
Supplement: Supplementary file 1 [file Supplementary_1.docx]

Supplementary 1

Discharge Guidance Checklist

*Department*: First Ward of Cardiology *Patient*: Female, 70 years old

*Discharge diagnosis:*

1. Arrhythmia, paroxysmal tachyventricular hemiatrial fibrillation, ventricular motility, cardiopulmonary resuscitation; 2. Chronic heart failure due to coronary heart disease 3. Mild cognitive impairment 4. Type 2 diabetes 5. Low T3 syndrome 6. Allergic dermatitis 7. Fatty liver 8. Pulmonary nodules 9. Carotid atherosclerosis

*Discharge instructions:*

1. Low-salt and low-fat diabetic diet. It is recommended to perform coronary angiography as early as possible to further clarify the degree of coronary artery stenosis, and perform intracardiac electrophysiological examination and cardiac radiofrequency ablation during the same period.

2. Take medicine as instructed.

3. Recheck blood routine, renal function, electrolytes, liver function, blood lipids, glycosylated hemoglobin, electrocardiogram, color Doppler ultrasound, and chest CT at 3 months, 6 months, and 1 year.

4. Follow-up in our department and the endocrinology department.

| **Drug name** | **Dosage** | **morning** | **Noon** | **Dinner** | **Precautions** |
| --- | --- | --- | --- | --- | --- |
| Edoxaban Toluenesulfate Tablets (Lixian 'an) | 30mg | 1piece |  |  | Long-term |
| Atorvastatin Calcium Tablets (Lipitor) | 20mg |  |  | 1 piece | Long-term |
| Dronedarone hydrochloride | 400mg | 1 piece |  | 1piece | Long-term，  Monitor heart rate |
| Sitagliptin metformin Tablets | 50mg | 1piece |  | 1piece | Long-term，  Monitor heart rate |
| Sitagliptin metformin Tablets | 10mg | 1piece |  |  | Stop taking the medicine after the allergy improves |
| Tongxinluo Capsules |  | 3 capsules | 3 capsules | 3 capsules |  |
| Pantoprazole Capsules | 40mg | 1piece |  |  | Discontinue the medication after 2 to 4 weeks of oral administration if there is no acid reflux or heartburn |

**Supplementary 2**

**A theoretical framework - Analysis and Overcoming Mechanism of the Dilemma during the Transition Period of Heart Failure**

To better implement the suggestions proposed in this paper from the aspects of Research, Practice, and Policy, based on the research findings concerning self-care in HF patients transitioning from the hospital to their homes, we introduce a theoretical framework. To simulate the predicaments and overcoming mechanisms faced by patients with heart failure during the transition period. As shown in Figure 1, which illustrates a simulacrum that elucidates the self-care process of patients with HF as they transition from the hospital to their homes. The simulation is specifically designed to offer an immersive experience that accurately represents and replicates the difficulties HF patients encounter during their transition period and their coping mechanisms. Upon discharge from the hospital, patients often navigate a complex and perplexing labyrinth within the confines of their own homes. The intricate configuration symbolizes the difficulties of existence, while the intricate intersections they encounter represent the perplexity they confront. Patients who successfully navigate the complex process and receive assistance in overcoming obstacles will experience a renewed sense of hope, empowerment, and motivation for personal development and transformation in HF patients.

## 1. Simulacrum of Themes: Hospital to Home: The Labyrinth of Transition in the Care of Heart Failure (HF) Patients

The Pilgrim. It represents an individual navigating the labyrinth of challenges. It carries a symbolic burden, reflecting personal struggles and uncertainty during the transition.

The Shadows. They are symbolic representations depicting the difficulties encountered by the Pilgrim. Every shadow symbolizes a distinct obstacle, such as physical ailments, economic hardships, emotional distress, and so on. The Pilgrim encounters many Shadows during the journey, symbolizing life's obstacles and difficulties. The Shadows can materialize as formidable barriers, perplexing routes, or tumultuous emotional states.

Labyrinth. The notion of the labyrinth is pertinent to the self-care experience of HF patients during transition periods. Upon transitioning from the hospital to their homes, HF patients will encounter a multitude of alterations in their daily routines as they embark on the process of self-care. The colossal labyrinth represents the trials and tribulations of life. The structure displays complexity and disarray, mirroring the perplexity of transitions between stages. Pilgrims commence their expedition by confronting the formidable entrance to the Labyrinth, which symbolizes the commencement of life's challenges and hardships. Nevertheless, once HF patients manage to surmount the challenges and navigate their way out of the complex situation, they will have completed a transition period.

The Watchful Guides. They represent the longing for assistance and encouragement throughout the expedition. These guides provide sagacity, motivation, and support to the Pilgrim. Within the intricate maze, the Pilgrim stumbles upon a sanctuary inhabited by the Vigilant Guides. The Guides provide counsel, recount tales of perseverance, and furnish resources for personal well-being.

The Crossroads of Self-Care. The Pilgrim arrives at an intricate intersection, representing the perplexity surrounding the practice of self-care during the process of change. Distinct routes symbolize diverse facets of self-care, encompassing physical, emotional, and mental well-being.

Bridging Challenges with Support. The Pilgrim acquires the skill to navigate the intricate maze with the aid of the vigilant Guides. Bridges are constructed to link distinct portions of the labyrinth, representing the assistance network established during difficult periods.

Emerging into Light. Having successfully surmounted obstacles and received assistance, the Pilgrim emerges into a more illuminated and expansive environment. It represents individual development, fortitude, and the profound influence of assistance and encouragement. It enhances personal development and change by cultivating resilience and receiving support.

## 2. Exhaustive Description of the Transitional Care Experiences of the 12 Heart Failure (HF) Patients

The analysis of the transitional care experiences of 12 heart failure (HF) patients revealed three primary themes: Post Admission Challenges, Dilemma in Self-Care During Transition, and the Desire for Help and Support. The participants faced significant post-admission challenges, including a difficult transition from hospital to home, necessitating adaptation to new body signals, managing physical and social limitations, and achieving a better understanding of their health. Many struggled with the sudden changes in their lives, experiencing stress and emotional impact. They reported a heightened need to monitor their bodies, often feeling overwhelmed by the physical fatigue that limited their social interactions. Despite these challenges, some participants gained a deeper understanding of their health and made positive lifestyle changes. The psychological burden of HF and the need for substantial support from healthcare providers were emphasized to ensure optimal care outcomes.

Participants also faced dilemmas in self-care during the transition, primarily due to a lack of knowledge about the disease and confusion regarding medication usage. Many were unaware of effective self-care practices, often relying on incomplete or incorrect information from the internet. This gap in knowledge led to difficulties in managing their condition and anxiety over medication administration. The desire for help and support was a common theme, with participants seeking personal and family support, professional healthcare services, and social and government assistance. Caregivers play a crucial role in aiding daily activities, yet their dual responsibilities often lead to stress and anxiety. Participants expressed a need for continuous professional guidance from trusted healthcare providers and support systems to facilitate smoother transitions and improve self-care capabilities. The findings highlight the necessity of integrated self-care programs and robust support networks to enhance the quality of life for HF patients during their transition from hospital to home.

## 3. Fundamental Structure of the Transitional Care Experiences of the 12 Heart Failure (HF) Patients

From the analysis of the presentations delivered by the 12 participants, three primary themes were identified:

Theme I: Post Admission Challenges

Participants unanimously agreed that heart failure (HF) significantly altered their lives, presenting numerous challenges during their transition from hospital to home. These challenges necessitated adaptations to new body signals and overcoming physical and social limitations. Key post-discharge difficulties reported by participants are systematically categorized in Table 2.

Sub-theme (1a): A difficult transition

The abrupt shift from hospital to home induced stress and psychological impact. Participants struggled with adjusting to their new health conditions and self-care responsibilities.

Sub-theme (1b): Paying attention to body signals

Participants developed a heightened awareness of their bodily changes, though some displayed reluctance or inconsistency in monitoring these changes regularly.

Sub-theme (1c): Physical and social limitations

HF led to decreased social interactions and increased physical fatigue, resulting in social withdrawal and avoidance of previously enjoyed activities.

Sub-theme (1d): Achieving a better understanding of one’s health

Despite challenges, participants gained a better understanding of their health, motivated to adopt healthier lifestyles and hopeful for their future.

Theme II: Dilemma in Self-Care During the Transition

Participants highlighted significant difficulties in understanding and adhering to their treatment and self-care regimens, primarily due to a lack of knowledge about HF and proper medication usage. These self-care challenges are further illustrated in Table 3.

Sub-theme (2a): Lack of knowledge and education about the disease

Many participants were unaware of their condition and self-care priorities, leading to confusion and ineffective self-care practices.

Sub-theme (2b): Lack of understanding regarding medication usage

Proper medication management was a major challenge, with participants expressing confusion and a need for professional guidance.

Theme III: Desire for Help and Support (Table 1)

Participants expressed a strong need for continuous support from caregivers, healthcare providers, and social and governmental assistance to manage their condition effectively. Patients' struggles with medication adherence stemmed from systemic gaps in support across three levels—family caregivers, healthcare providers, and societal/governmental structures—as detailed in Table 4.

Sub-theme (3a): Personal and family support

Caregivers played a crucial role in assisting with daily activities and self-care, though the reliance on caregivers often led to dependency and stress.

Sub-theme (3b): Support for healthcare services

Participants desired ongoing support from healthcare professionals, particularly those they trusted, to navigate their self-care responsibilities.

Sub-theme (3c): Support from social and government assistance

The lack of sufficient caregiving staff and financial constraints were significant challenges, highlighting the need for community and governmental support.

The transitional care journey for HF patients is defined by three primary themes: the post-admission challenges they face, the dilemmas in self-care during the transition, and the desire for help and support. Each theme encompasses several sub-themes that collectively highlight the emotional, physical, and social complexities involved in managing heart failure. This distilled structure provides a succinct yet profound understanding of the participants' experiences and the universal aspects of their transitional care journey.
